# Supplementary material for: Cereulide Synthetase Acquisition and Loss Events within the Evolutionary History of Group III Bacillus cereus Sensu Lato Facilitate the Transition between Emetic and Diarrheal Foodborne Pathogens
Source: PubMed Central journal article supplement (PMC7448271; doi:10.1128/mbio.01263-20), 2020-08-25
Supplement: mBio.01263-20-s0001.pdf [file mBio.01263-20-s0001.pdf]

## Cereulide synthetase acquisition and loss events within the evolutionary history of Group III *Bacillus cereus sensu lato* facilitate the transition between emetic and diarrheal foodborne pathogen

### 1 Supplemental Text

2 Detailed descriptions of all methods, plus references.

3 **Acquisition of Group III *Bacillus cereus s.l.* genomes and metadata.** All genomes submitted  
4 to the National Center for Biotechnology Information (NCBI) RefSeq (1) database under the  
5 name of a published species belonging to *B. cereus s.l.* (i.e., one of *B. albus*, *anthracis*, *cereus*,  
6 *cytotoxicus*, *luti*, *mobilis*, *mycooides*, *nitratireducens*, *pacificus*, *paramycooides*, *paranthracis*,  
7 *proteolyticus*, *pseudomycooides*, *thuringiensis*, *toyonensis*, *tropicus*, *weihenstephanensis*, or  
8 *wiedmannii*) (2-7) were downloaded ( $n = 2,231$ ; accessed November 19, 2018). The one-way  
9 average nucleotide identity BLAST (ANIb) function in BTypyer version 2.3.3 (8) was used to  
10 calculate ANIb values between each of the 2,231 assembled *B. cereus s.l.* genomes and genomes  
11 of each of the 18 published *B. cereus s.l.* species as they existed in 2019 (for all but *B. anthracis*,  
12 the species type strain genome was used; for *B. anthracis*, the closed chromosome of *B.*  
13 *anthracis* str. Ames was used, as it is the reference genome for the species and the only type  
14 strain genome was scaffolded). *B. cereus s.l.* genomes which (i) most closely resembled the *B.*  
15 *paranthracis* type strain genome (i.e., the highest ANIb value was produced when the genome  
16 was compared to *B. paranthracis*), and (ii) shared an ANIb value  $\geq 95$  with the *B. paranthracis*  
17 type strain genome were used in subsequent steps ( $n = 120$ ), as this set of genomes contained all  
18 Group III *B. cereus s.l.* genomes that possessed genes encoding cereulide synthetase (described  
19 in detail below). The resulting 120 Group III *B. cereus s.l.* genomes were supplemented with an  
20 additional 30 Group III *B. cereus s.l.* genomes of strains isolated in conjunction with a 2016  
21 emetic outbreak in New York State (9), resulting in a total of 150 Group III *B. cereus s.l.*  
22 genomes (Supplemental Table S1). FastANI version 1.0 (10) was used to confirm that all 150  
23 genomes selected for this study (i) shared  $\geq 95$  ANI with the *B. paranthracis* type strain genome,

### **Cereulide synthetase acquisition and loss events within the evolutionary history of Group III *Bacillus cereus sensu lato* facilitate the transition between emetic and diarrheal foodborne pathogen**

24 and (ii) most closely resembled the *B. paranthracis* type strain genome when compared to the 18  
25 *B. cereus s.l.* type strain/reference genomes.

26         Metadata for each of the 150 Group III *B. cereus s.l.* genomes was obtained using  
27 publicly available records. First, the NCBI BioSample (11) associated with each genome  
28 assembly was queried for (i) isolation source, (ii) geographic location, and (iii) year of isolation.  
29 If any of this information was not available within the BioSample record, the BioProject linked  
30 to the BioSample was queried. If this search did not return additional metadata, any publications  
31 (e.g., research papers, genome announcements) linked to the BioProject were queried. Finally,  
32 strain names of genomes without linked publications were queried in Google to obtain possible  
33 unlinked publications or hits in additional public databases. Using metadata that resulted from  
34 these searches, each genome was assigned (i) an isolation source, (ii) a geographic location, and  
35 (iii) a year of isolation. For isolation source, genomes were categorized into one of the following  
36 groups: ANI (isolated from an animal, excluding humans), ENV (isolated from an environment  
37 not meant for human consumption), FOO (isolated directly from a food product, food ingredient,  
38 or dietary supplement with the potential for human consumption), HUM (isolated from a  
39 human), and XXX (isolated from an unknown source; Supplemental Table S1). For geographic  
40 location, isolates were grouped by their country of isolation, except for a few cases in which a  
41 major autonomous region was listed (i.e., Hong Kong), a country which no longer existed was  
42 listed (i.e., Czechoslovakia), or a country of isolation designation was not applicable (i.e.,  
43 isolation occurred in the Pacific Ocean or Antarctica; Supplemental Table S1). Isolates which  
44 could not be assigned a country of isolation were given a geographic isolation designation of  
45 XX. For year of isolation, genomes of strains with an “exact” year of isolation listed in a public  
46 database or publication were assigned to that particular year (Supplemental Table S1). For

### **Cereulide synthetase acquisition and loss events within the evolutionary history of Group III *Bacillus cereus sensu lato* facilitate the transition between emetic and diarrheal foodborne pathogen**

47 genomes for which this information was unavailable, a “maximum year of isolation” which  
48 corresponded to the year associated with the earliest appearance of the strain in a publication or  
49 public resource (e.g., database or strain collection) was assigned (Supplemental Table S1).

50       Each of the 150 Group III *B. cereus s.l.* genomes were additionally assigned a sequence  
51 type (ST), as well as a designation of potentially emetic or not. To assess the emetic potential of  
52 each of the 150 Group III *B. cereus s.l.* genomes, BTyper version 2.3.3 was used to detect  
53 cereulide synthetase genes *cesABCD* in each assembly, first using the default coverage and  
54 identity thresholds (70 and 50%, respectively), and a second time with 0% coverage to ensure  
55 that *cesABCD* were absent from genomes in which the genes were not detected (the only genome  
56 that was affected by this was that of one of the outbreak isolates, FSL R9-6384, which had *cesD*  
57 split on two contigs). All isolates in which any of *cesABCD* were detected possessed all four  
58 genes; these isolates were given a designation of *ces*-positive with the potential to cause emetic  
59 disease. Isolates in which *cesABCD* were not detected were given a designation of *ces*-negative.  
60 BTyper was additionally used to detect *cesABCD* in each of the 2,111 *B. cereus s.l.* genomes not  
61 included in this study, as well as to assign all *B. cereus s.l.* genomes to a *panC* group using the  
62 typing scheme described by Guinebretiere, et al (12). All 150 *B. cereus s.l.* genomes used in this  
63 study were assigned to *panC* Group III, and all Group III genomes possessing *cesABCD* were  
64 confirmed to have been included in this study. The only other genomes that possessed *cesABCD*  
65 belonged to *panC* Group VI and most closely resembled the type strain genomes of *B.*  
66 *mycooides*/*B. weihenstephanensis* (referred to previously as “emetic *B. weihenstephanensis*”) (7).  
67 BTyper version 2.3.3 was also used to assign each genome to a ST using the seven-gene multi-  
68 locus sequence typing (MLST) scheme available in PubMLST (13). One genome (NCBI RefSeq

### **Cereulide synthetase acquisition and loss events within the evolutionary history of Group III *Bacillus cereus sensu lato* facilitate the transition between emetic and diarrheal foodborne pathogen**

69 Accession GCF\_003270025) was assigned a probable ST of 205 but had mismatches in the *gmk*  
70 and *tpi* loci; as a result, a “x” character was appended after its ST to denote this (ST205x;  
71 Supplemental Table S1).

72 Using metadata and typing results obtained as described above, each genome was  
73 assigned a strain name adhering to the following format: (i) isolation source, (ii) geographic  
74 location, (iii) year of isolation, (iv) ANI-assigned species (i.e., *paranthracis*, the proposed  
75 species definition in use in 2018; note that a recently published taxonomic framework proposes  
76 the use of *mosaicus*) (7), (v) MLST-assigned ST, (vi) *ces*-positive or *ces*-negative designation,  
77 and (vii) RefSeq assembly accession or Food Microbe Tracker Strain identifier (14) for genomes  
78 obtained from RefSeq or the foodborne outbreak described by Carroll et al., respectively  
79 (Supplemental Table S1) (9). The rationale for assigning each genome a particular isolation  
80 source, geographic location, or isolation year can be found in Supplemental Table S1.

81 **Construction of Group III *B. cereus s.l.* maximum likelihood phylogenies and ancestral**  
82 **state reconstruction.** kSNP3 version 3.1 (15, 16) was used to identify SNPs among genomes in  
83 the following data sets: (i) all 150 Group III *B. cereus s.l.* genomes described above, plus the  
84 closed RefSeq species reference genome for *B. anthracis* (*B. anthracis* str. Ames, NCBI RefSeq  
85 Accession GCF\_000007845.1; this genome would be treated as an outgroup for ancestral state  
86 reconstruction), and (ii) all 150 Group III *B. cereus s.l.* genomes described above, plus the draft  
87 genome of *B. cereus s.l.* strain AFS057383 (NCBI RefSeq Accession GCF\_002574215.1; this  
88 genome would also be treated as an outgroup to ensure that choice of outgroup did not affect  
89 ancestral state reconstruction). For both data sets, Kchooser was used to determine the optimal *k*-  
90 mer size ( $k = 21$  for both). Alignments of (i) core and (ii) majority (i.e., detected in > 50% of all

### **Cereulide synthetase acquisition and loss events within the evolutionary history of Group III *Bacillus cereus sensu lato* facilitate the transition between emetic and diarrheal foodborne pathogen**

91 genomes in the alignment) SNPs detected among the 150 Group III *B. cereus s.l.* genomes in this  
92 study, plus one of two outgroup genomes (i.e., either *B. anthracis* str. Ames or *B. cereus s.l.* str.  
93 AFS057383) using kSNP3 were used as input for IQ-TREE version 1.6.10 (17). For each of the  
94 four SNP alignments (i.e., each combination of outgroup and either core or majority SNPs), the  
95 optimal ascertainment bias-aware (18) nucleotide substitution model selected using ModelFinder  
96 (i.e., the model with the lowest Bayesian Information Criterion [BIC] value) was used (19), and  
97 branch support was assessed using 1,000 replicates of the ultrafast bootstrap approximation (20,  
98 21).

99       To estimate ancestral character states of internal nodes in the Group III *B. cereus s.l.*  
100 phylogeny as they related to cereulide production (i.e., whether a node in the tree represents an  
101 ancestor that is more likely to be *ces*-positive or *ces*-negative), the presence or absence of *ces*  
102 within each genome was treated as a binary state. Each of the four phylogenies constructed as  
103 described above was rooted at its respective outgroup (i.e., either *B. anthracis* str. Ames or *B.*  
104 *cereus s.l.* str. AFS057383) using the root function in the ape package (22, 23) in R version 3.6.1  
105 (24). Stochastic character maps were simulated on each of the four phylogenies using the  
106 make.simmap function in the phytools package (25) and the all-rates-different (ARD) model in  
107 the ape package. For each of the four phylogenies, either (i) equal root node prior probabilities  
108 for *ces*-positive and *ces*-negative states (i.e.,  $P(\textit{ces present}) = 0.5$  and  $P(\textit{ces absent}) = 0.5$ ),  
109 or (ii) estimated root node prior probabilities for *ces*-positive and *ces*-negative states obtained  
110 using the make.simmap function were used. For each root node prior/phylogeny combination  
111 (eight total combinations of two root node priors and four phylogenies), an empirical Bayes  
112 approach was used, in which a continuous-time reversible Markov model was fitted, followed by

### **Cereulide synthetase acquisition and loss events within the evolutionary history of Group III *Bacillus cereus sensu lato* facilitate the transition between emetic and diarrheal foodborne pathogen**

113 1,000 simulations of stochastic character histories using the fitted model and tree tip states  
114 (Supplemental Table S2). The resulting phylogenies were plotted using the densityMap function  
115 in the phytools package.

116 To ensure that ancestral state reconstruction would not be affected by genomes of isolates  
117 over-represented in RefSeq (e.g., genomes confirmed or predicted to have been derived from  
118 strains isolated from the same outbreak), potential duplicate genomes were removed using isolate  
119 metadata and by assessing isolate clustering in the ML phylogenies. One representative genome  
120 was selected from clusters that likely consisted of duplicate genomes and/or isolates derived  
121 from the same source. For example, this procedure reduced 30 closely related isolates from a  
122 2016 outbreak (9) to one isolate. Overall, this approach yielded a reduced, de-replicated set of 71  
123 Group III *B. cereus s.l.* genomes (Supplemental Table S1). kSNP and IQ-TREE were again used  
124 to identify core and majority SNPs and construct ML phylogenies among the set of 71 de-  
125 replicated genomes, plus each of the two outgroup genomes, and ancestral state reconstruction  
126 was performed as described above (for both data sets, the optimal  $k$ -mer size determined by  
127 Kchooser was 23).

128 **Assessment of Group III *B. cereus s.l.* population structure.** kSNP3 version 3.1 was used to  
129 identify core SNPs among the de-replicated set of 71 Group III *B. cereus s.l.* genomes, using the  
130 optimal  $k$ -mer size selected by Kchooser ( $k = 23$ ). The set of core SNPs produced by kSNP3 was  
131 used as input for RhierBAPS (26) to identify clusters among the 71 genomes, using two  
132 clustering levels. The same set of 71 genomes was used as input for PopCOGenT (downloaded  
133 October 5, 2019) to identify gene flow among sub-populations of Group III *B. cereus s.l.*  
134 genomes (27), using Mugsy version v1r2.3 (28), PhyML version 20120412 patch 20131031 (29),

### **Cereulide synthetase acquisition and loss events within the evolutionary history of Group III *Bacillus cereus sensu lato* facilitate the transition between emetic and diarrheal foodborne pathogen**

135 MMseqs2 version 67c04ae456664d910059dc194863451475d2e15a (30), and MUSCLE version  
136 3.8.31 (31).

137 **Group III *B. cereus s.l.* ST 26 isolate set construction and temporal diagnostics.** A recent  
138 study (32) has shown that the common practice of removing duplicate sequences to reduce a set  
139 of genomes to a set of unique sequences can lead to biases when constructing temporal  
140 phylogenies using Bayesian methods. To minimize potential biases introduced by both the over-  
141 representation of genomes derived from a single outbreak (i.e., the 2016 emetic outbreak in New  
142 York State) (9, 33), as well as the biases that sequence de-replication can introduce within a  
143 Bayesian framework (32), three separate isolate sets were constructed in which pseudo-random  
144 numbers generated using the random module in Python3 were used to select (i) three, (ii) five,  
145 (iii) and ten random genomes from the full set of 30 emetic ST 26 genomes from a 2016 New  
146 York State (NYS) outbreak. Each randomly selected subset of isolates derived from the known  
147 outbreak ( $n = 3, 5, \text{ and } 10$ ) were combined with all remaining ST 26 genomes, yielding three  
148 separate isolate sets comprising a total of 37, 39, and 44 ST 26 genomes, respectively (referred to  
149 hereafter as the “Original 2018/Select 3 NYS”, “Original 2018/Select 5 NYS”, and “Original  
150 2018/Select 10 NYS” isolate sets, respectively; Supplemental Table S3). To additionally ensure  
151 that the inclusion of four ST 26 strains with no exact year of isolation did not significantly  
152 influence phylogeny construction (Supplemental Table S1), three additional isolate sets were  
153 constructed by removing these four isolates from each of the Original 2018/Select 3 NYS,  
154 Original 2018/Select 5 NYS, and Original 2018/Select 10 NYS isolate sets (referred to as the  
155 Original 2018/Select 3 NYS No Estimated, Original 2018/Select 5 NYS No Estimated, and  
156 Original 2018/Select 10 NYS No Estimated isolate sets, each with 33, 35, and 40 ST 26

### **Cereulide synthetase acquisition and loss events within the evolutionary history of Group III *Bacillus cereus sensu lato* facilitate the transition between emetic and diarrheal foodborne pathogen**

157 genomes, respectively; Supplemental Table S3). Finally, an isolate set comprising all 64 ST 26  
158 isolates (including all 30 NYS outbreak isolate genomes) was constructed (referred to as the  
159 Original 2018/All NYS Outbreak isolate set, and, due to potential biases stemming from the  
160 over-representation of isolates from a single outbreak, included merely for comparative  
161 purposes; Supplemental Table S3).

162         The seven aforementioned isolate sets contained all ST 26 genomes available in NCBI's  
163 RefSeq Assembly database in 2018 (accessed November 19, 2018). To identify potential  
164 additional ST 26 genomes submitted to NCBI between 2018 and 2020, the most recent set of *B.*  
165 *cereus s.l.* genomes available in NCBI's RefSeq Assembly database were downloaded (accessed  
166 May 14, 2020); all *B. cereus s.l.* genomes with RefSeq Assembly accession numbers that were  
167 not included in the original 2018 data set ( $n = 371$ ) were characterized using BTyper and  
168 FastANI as described above (see section "Acquisition of Group III *Bacillus cereus s.l.* genomes  
169 and metadata" above). This search yielded an additional nine genomes assigned to ST 26 and  
170 included all five *ces*-positive *B. cereus s.l.* genomes added to RefSeq between 2018 and 2020  
171 (i.e., among genomes included in the 2020 RefSeq Assembly download but not available in the  
172 2018 download, cereulide synthetase-encoding *cesABCD* were detected in genomes assigned to  
173 ST 26 alone; Supplemental Table S1). The original 2018 ST 26 genomes ( $n = 64$ ) were  
174 supplemented with these nine ST 26 genomes downloaded in 2020 (Supplemental Table S1), and  
175 four additional isolate sets were constructed by randomly selecting (i) three, (ii) five, and (iii) ten  
176 NYS outbreak genomes out of 30 total (as described above; referred to hereafter as the New  
177 2020/Select 3 NYS, New 2020/Select 5 NYS, and New 2020/Select 10 NYS isolate sets,  
178 respectively); for the fourth isolate set (iv), all five genomes with no exact year of isolation were



### **Cereulide synthetase acquisition and loss events within the evolutionary history of Group III *Bacillus cereus sensu lato* facilitate the transition between emetic and diarrheal foodborne pathogen**

179 removed from the New 2020/Select 5 NYS isolate set to ensure that the inclusion of these five  
180 genomes did not significantly affect phylogeny construction (referred to hereafter as the New  
181 2020/Select 5 NYS No Estimated isolate set). The four New 2020 isolate sets contained (i) 46,  
182 (ii) 48, (iii) 53, and (iv) 43 total ST 26 genomes, respectively (Supplemental Table S3).

183 For each of the 11 isolate sets described above, Snippy version 4.3.6 (34) was used to  
184 identify core SNPs among all ST 26 genomes included in the isolate set, using the closed  
185 chromosome of emetic *B. cereus s.l.* ST 26 str. AH187 (NCBI RefSeq Assessment NC\_011658.1)  
186 as a reference genome and the following software as dependencies: BWA MEM version 0.7.13-  
187 r1126 (35, 36), Minimap2 version 2.15 (37), SAMtools version 1.8 (38), BEDtools version  
188 2.27.1 (39, 40), BCFtools version 1.8 (41), FreeBayes version v1.1.0-60-gc15b070 (42), vcflib  
189 version v1.0.0-rc2 (43), vt version 0.57721 (44), SnpEff version 4.3T (45), samclip version 0.2  
190 (46), seqtk version 1.2-r102-dirty (47), and snp-sites version 2.4.0 (48). Depending on the isolate  
191 set, up to 32 isolates had Illumina short reads of adequate quality after trimming and adapter  
192 removal using Trimmomatic version 0.39 (49) (as determined using FastQC version 0.11.8) (50);  
193 as such, reads were used as input for these isolates, and assembled genomes were used for all  
194 remaining ST 26 strains included in the isolate set (Supplemental Table S1).

195 Gubbins version 2.3.4 (51) was used to remove recombination from each resulting  
196 alignment, and snp-sites was used to obtain core SNPs among all genomes included in the isolate  
197 set. For each isolate set, IQ-TREE was used to construct a ML phylogeny, using the isolate set  
198 core SNP alignment as input, the optimal ascertainment bias-aware nucleotide substitution model  
199 selected using ModelFinder, and 1,000 replicates of the ultrafast bootstrap approximation. The

### **Cereulide synthetase acquisition and loss events within the evolutionary history of Group III *Bacillus cereus sensu lato* facilitate the transition between emetic and diarrheal foodborne pathogen**

200 temporal signal of each resulting ML phylogeny was assessed using TempEst version 1.5.3 (52)  
201 (Supplemental Table S3).

202 LSD2 version 1.4.2.2 (53) was additionally used to obtain ML estimates of the  
203 evolutionary rate and time to most recent common ancestor (tMRCA) for each isolate set, using  
204 (i) the ML phylogeny for each isolate set as input, (ii) dates corresponding to the year of isolation  
205 associated with each isolate, (iii) constrained mode (-c option), (iv) variances calculated  
206 according to input branch lengths (-v 1), (v) roots estimated using constrained mode on all  
207 branches (-r as), (vi) a sequence length of 5,269,030 bp (-s 5269030, the length of the  
208 chromosome of emetic *B. cereus s.l.* ST 26 str. AH187), and (vii) a confidence interval (CI)  
209 sampling number of 1,000 (-f 1000; Supplemental Table S3). When providing dates (ii) for  
210 genomes that could not be assigned an exact year of isolation, a date range was provided for the  
211 respective genome, with bounds selected corresponding to (i) a year beyond the maximum year  
212 of isolation (upper bound; see “Acquisition of *Bacillus cereus s.l.* genomes and metadata”  
213 section above), and (ii) a high-confidence minimum value (lower bound) based on available  
214 metadata (e.g., a publication reporting that a strain was isolated within a particular timeframe,  
215 but no exact year was reported for the isolate), or, if none was available, a value of 1971.0 or  
216 1900.0 for *ces*-positive and *ces*-negative genomes, respectively (1971.0 was used for *ces*-positive  
217 genomes, as emetic “*B. cereus*” illness was only first described in 1971) (54).

218 **Model selection for Group III *B. cereus s.l.* ST 26 isolate sets.** In order to select an optimal  
219 molecular clock/population model combination for Bayesian phylogeny construction, two isolate  
220 sets were selected to undergo the stepping stone sampling (55) procedure implemented in the  
221 MODEL\_SELECTION package in BEAST version 2.5.1 (56, 57) (see section “Group III *B.*

### **Cereulide synthetase acquisition and loss events within the evolutionary history of Group III *Bacillus cereus sensu lato* facilitate the transition between emetic and diarrheal foodborne pathogen**

222 *cereus s.l.* ST 26 isolate set construction and temporal diagnostics” above): (i) the Original  
223 2018/Select 3 NYS isolate set ( $n = 37$ ), and (ii) the Original 2018/All NYS Outbreak isolate set  
224 ( $n = 64$ ; Supplemental Table S4). For both isolate sets, the isolate set core SNP alignment was  
225 used as input, and tip dates that corresponded to the year of isolation associated with each isolate  
226 were used. For genomes that could be assigned an exact year of isolation (see section  
227 “Acquisition of Group III *Bacillus cereus s.l.* genomes and metadata” above), a fixed tip date  
228 was used (i.e., the tip date was not estimated). For genomes that could not be assigned an exact  
229 year of isolation, tip dates were estimated using a uniform distribution, with bounds selected  
230 corresponding to (i) a year beyond the maximum year of isolation (upper bound; see  
231 “Acquisition of *Bacillus cereus s.l.* genomes and metadata” section above), and (ii) a high-  
232 confidence minimum value based on available metadata (e.g., a publication reporting that a strain  
233 was isolated within a particular timeframe, but no exact year was reported for the isolate), or, if  
234 none was available, a value of 1971.0 or 1900.0 for *ces*-positive and *ces*-negative genomes,  
235 respectively (for the Original 2018/All NYS Outbreak isolate set, a lower bound of 1900 was  
236 used for *ces*-positive genomes as well, as this isolate set is likely biased due to the over-  
237 representation of isolates from a single outbreak and was included in the study solely for  
238 comparative purposes). For each isolate set, an ascertainment bias correction based on the GC  
239 content of the closed chromosome of emetic *B. cereus s.l.* ST 26 str. AH187 was used to account  
240 for the use of solely variant sites (58). For (i) the Original 2018/Select 3 NYS isolate set,  
241 combinations of (a) either a strict or relaxed lognormal molecular clock (59) and (b) either a  
242 Constant Coalescent, Coalescent Bayesian Skyline (60), or Birth-Death Skyline Serial (61)  
243 population model were tested (i.e., six clock/population model combinations; Supplemental  
244 Table S4). For (ii) the Original 2018/All NYS Outbreak isolate set, combinations of (a) either a

### **Cereulide synthetase acquisition and loss events within the evolutionary history of Group III *Bacillus cereus sensu lato* facilitate the transition between emetic and diarrheal foodborne pathogen**

245 strict or relaxed lognormal molecular clock and (b) either a Constant Coalescent or Coalescent  
246 Bayesian Skyline model were tested, as well as a relaxed clock/Birth-Death Skyline Serial model  
247 combination (i.e., five clock/population model combinations; Supplemental Table S4). For  
248 models that relied on a Birth-Death Skyline Serial population model, a change point was  
249 introduced into the model so that the “samplingProportion” parameter could be set to 0 before  
250 the first sample date (to account for the fact that little-to-no sampling effort was made prior to  
251 the 1970s). For (ii) the Original 2018/All NYS Outbreak isolate set, an additional change point  
252 was introduced at 2014.0 to account for the over-representation of ST 26 strains isolated between  
253 2014 and 2016 (the most recent isolation date in the isolate set). For all models, the  
254 Standard\_TVMEf nucleotide substitution model implemented in the SSM package (62) was used,  
255 as it was the optimal nucleotide substitution model selected for each isolate set using the  
256 modelTest function in R’s phangorn (63) package (based on BIC values), along with the Gamma  
257 category count set to 5. Additionally, for all models, a lognormal prior was placed on the  
258 clockRate and uclMean parameters for strict and lognormal relaxed molecular clock models,  
259 respectively. For all isolate set/model combinations, marginal likelihood values were obtained  
260 for each of three independent stepping stone sampling runs performed in BEAST version 2.5.1,  
261 using ten steps with chain lengths of at least ten million generations, an alpha value of 0.3,  
262 100,000 states of pre-burn-in, and 10% burn-in (Supplemental Table S4). For both isolate sets, a  
263 combination of a relaxed lognormal molecular clock and a Coalescent Bayesian Skyline  
264 population model was selected as the optimal clock/population model combination and was thus  
265 used in subsequent steps (Supplemental Table S4).

### **Cereulide synthetase acquisition and loss events within the evolutionary history of Group III *Bacillus cereus sensu lato* facilitate the transition between emetic and diarrheal foodborne pathogen**

266 **Group III *B. cereus s.l.* ST 26 temporal phylogeny construction.** A tip-dated phylogeny was  
267 constructed for each of the eight following isolate sets using BEAST version 2.5.1 (see section  
268 “Group III *B. cereus s.l.* ST 26 isolate set construction and temporal diagnostics” above;  
269 Supplemental Table S3): (i) the Original 2018/Select 3 NYS isolate set ( $n = 37$ ), (ii) the Original  
270 2018/Select 3 NYS No Estimated isolate set ( $n = 33$ ), (iii) the Original 2018/Select 5 NYS  
271 isolate set ( $n = 39$ ), (iv) the Original 2018/Select 10 NYS isolate set ( $n = 44$ ), (v) the Original  
272 2018/All NYS Outbreak isolate set ( $n = 64$ ), (vi) the New 2020/Select 3 NYS isolate set ( $n = 46$ ),  
273 (vii) the New 2020/Select 5 NYS isolate set ( $n = 48$ ), (viii) the New 2020/Select 5 NYS No  
274 Estimated isolate set ( $n = 43$ ).

275 For each isolate set, the isolate set core SNP alignment was used as input (see section  
276 “Group III *B. cereus s.l.* ST 26 isolate set construction and temporal diagnostics” above), and  
277 isolation years were used as tip dates. For genomes that could be assigned an exact year of  
278 isolation (see section “Acquisition of Group III *Bacillus cereus s.l.* genomes and metadata”  
279 above), a fixed tip date was used (i.e., the tip date was not estimated). For genomes that could  
280 not be assigned an exact year of isolation, tip dates were estimated using a uniform distribution,  
281 with bounds selected corresponding to (i) a year beyond the maximum year of isolation (upper  
282 bound; see “Acquisition of *Bacillus cereus s.l.* genomes and metadata” section above), and (ii) a  
283 high-confidence minimum value based on available metadata (e.g., a publication reporting that a  
284 strain was isolated within a particular timeframe, but no exact year was reported for the isolate),  
285 or, if none was available, a value of 1971.0 or 1900.0 for *ces*-positive and *ces*-negative genomes,  
286 respectively (lower bound; for the Original 2018/All NYS Outbreak isolate set, which was

### **Cereulide synthetase acquisition and loss events within the evolutionary history of Group III *Bacillus cereus sensu lato* facilitate the transition between emetic and diarrheal foodborne pathogen**

287 included merely for comparative purposes, a lower bound of 1900 was used for *ces*-positive  
288 genomes as well).

289 For each isolate set, an ascertainment bias correction based on the GC content of the  
290 closed chromosome of emetic *B. cereus s.l.* ST 26 str. AH187 was used to account for the use of  
291 solely variant sites (58). For all isolate sets, a relaxed lognormal molecular clock (59) and  
292 Coalescent Bayesian Skyline (60) population model were used, as it was the optimal  
293 clock/population model selected via stepping stone sampling (see section “Model selection for  
294 Group III *B. cereus s.l.* ST 26 isolate sets” above). For all isolate sets except the Original  
295 2018/All NYS Outbreak isolate set (v; included merely for comparative purposes), an initial  
296 clock rate of  $3.92 \times 10^{-8}$  substitutions/site/year (estimated in a previous study of anthrax-causing  
297 Group III *B. cereus s.l.* isolates) was used (64), along with a broad lognormal prior on the  
298 *uclMean* parameter (in real space,  $M = 1.0 \times 10^{-4}$  and  $S = 3.0$ ), which yielded a median of  $1.11$   
299  $\times 10^{-6}$  and 2.5 and 97.5% quantiles of  $3.11 \times 10^{-9}$  and  $3.97 \times 10^{-4}$  substitutions/site/year,  
300 respectively. For the nucleotide substitution model, the optimal substitution model selected for  
301 the isolate set using the *modelTest* function in R’s *phangorn* (63) package (based on BIC values),  
302 as implemented in the BEAST2 SSM (62) package, was used, along with the Gamma category  
303 count set to 5 (Supplemental Table S3; for seven and one of eight isolate sets, this was the  
304 *Standard\_TVMe*f and *Standard\_TVM* model, respectively).

305 For each of the eight isolate sets, five independent runs using the model described above  
306 (Supplemental Table S3) were performed, using chain lengths of at least 100 million generations,  
307 sampling every 10,000 generations. For each independent run, Tracer version 1.7.1 (65) was  
308 used to ensure that effective sample size (ESS) values for all parameters were sufficiently high

### **Cereulide synthetase acquisition and loss events within the evolutionary history of Group III *Bacillus cereus sensu lato* facilitate the transition between emetic and diarrheal foodborne pathogen**

309 (ESS > 200) and that each parameter had mixed adequately with 10% burn-in. LogCombiner-2  
310 was used to combine log and tree files for each of the five independent runs with 10% burn-in,  
311 and Tracer was again used to (i) ensure that the combined log file showcased adequate mixing  
312 with 10% burn-in, and (ii) construct a Coalescent Bayesian Skyline plot (Supplemental Figure  
313 S19). For each isolate set, the prior was additionally sampled in the absence of sequence data,  
314 and the resulting parameter distributions were compared to the respective combined log file for  
315 the isolate set in Tracer. TreeAnnotator-2 (66) was used to produce maximum clade credibility  
316 (MCC) trees from the combined tree files associated with each isolate set, using median node  
317 heights. The resulting phylogenies were annotated using FigTree version 1.4.3 (67) and the  
318 phytools (25), ggtree (68, 69), and ape (22, 23) packages in R version 3.6.1 (24).

319         Among all eight isolate sets that underwent Bayesian phylogeny construction, mean and  
320 median estimates for the rate.mean parameter ranged from [ $1.12 \times 10^{-7}$ ,  $2.36 \times 10^{-7}$ ] and [ $1.07 \times$   
321  $10^{-7}$ ,  $2.31 \times 10^{-7}$ ] substitutions/site/year, respectively, with all isolate sets producing 95% highest  
322 posterior density (HPD) intervals that overlapped and contained all mean and median rate.mean  
323 estimates in their respective bounds (Supplemental Table S3). Mean and median estimates for  
324 the TreeHeight parameter ranged from [187.82, 519.59] and [173.65, 375.71] years, respectively  
325 (Supplemental Table S3). All 95% HPD intervals for the TreeHeight parameter additionally  
326 overlapped for all isolate sets, although several New 2020 data sets produced mean and median  
327 TreeHeight parameter estimates that were greater than the TreeHeight 95% HPD upper bounds  
328 produced by several Original 2018 isolate sets (Supplemental Table S3). Skyline plots of the ST  
329 26 effective population size showcased a dramatic decrease after 2010 for all isolate sets  
330 (Supplemental Figure S19); however, this is likely a sampling artifact (e.g., possibly resulting

### **Cereulide synthetase acquisition and loss events within the evolutionary history of Group III *Bacillus cereus sensu lato* facilitate the transition between emetic and diarrheal foodborne pathogen**

331 from the over-representation of closely related strains isolated from increased outbreak and  
332 illness monitoring efforts after 2014) and not a true recent contraction in population size (33),  
333 and should be interpreted with extreme caution. The final temporal phylogeny reported in the  
334 main manuscript was that produced by the New 2020/Select 3 NYS isolate set ( $n = 46$ ) using  
335 median node heights, as the New 2020 isolate set contained several novel ST 26 genomes that  
336 were not available in RefSeq in 2018 (Supplemental Table S1), and all New 2020 isolate sets  
337 produced similar median rate.mean and TreeHeight parameter estimates (Supplemental Table  
338 S3).

339 **Cereulide synthetase ancestral state reconstruction for ST 26 genomes.** Ancestral state  
340 reconstruction as it related to cereulide production capabilities was performed using the temporal  
341 phylogeny constructed for each of eight isolate sets using Snippy, BEAST 2, LogCombiner-2,  
342 and TreeAnnotator-2 (see section “Group III *B. cereus s.l.* ST 26 temporal phylogeny  
343 construction” above) as input. Stochastic character maps were simulated on each phylogeny  
344 using the make.simmap function, the ARD model, and one of the following three priors on the  
345 root node, corresponding to the *ces*-positive and *ces*-negative state of the root node: (i) equal  
346 probability of the root node belonging to a *ces*-positive or *ces*-negative state; (ii) estimated  
347 probabilities of the root node belonging to a *ces*-positive or *ces*-negative state, obtained using the  
348 make.simmap function; and (iii) probability of the root node being in a *ces*-positive or *ces*-  
349 negative state set to 0.2 and 0.8, respectively, as the probability of the ST 26 ancestor being *ces*-  
350 negative was estimated to be between 0.78 and 0.83 (depending on the choice of outgroup) when  
351 core SNPs among all Group III *B. cereus s.l.* genomes were used for ancestral state  
352 reconstruction (see section “Construction of Group III *B. cereus s.l.* maximum likelihood



### **Cereulide synthetase acquisition and loss events within the evolutionary history of Group III *Bacillus cereus sensu lato* facilitate the transition between emetic and diarrheal foodborne pathogen**

353 phylogenies and ancestral state reconstruction” above). An empirical Bayes approach was used,  
354 in which a continuous-time reversible Markov model was fitted, followed by 10,000 simulations  
355 of stochastic character histories using the fitted model and the tree tip states. The resulting  
356 phylogenies were plotted using the densityMap function in the phytools package. The final ST  
357 26 ancestral state reconstruction results reported in the main manuscript were those produced by  
358 the New 2020/Select 3 NYS isolate set ( $n = 46$ ) using median node heights, as the New 2020  
359 isolate set contained several novel ST 26 genomes that were not available in RefSeq in 2018  
360 (Supplemental Table S1), and all New 2020 isolate sets produced similar ancestral state  
361 reconstruction results (Supplemental Table S5).

#### **362 Evaluation of the influence of reference genome selection on ST 26 phylogenomic topology.**

363 To determine if choice of reference genome affected the topology of the ST 26 phylogeny, SNPs  
364 were identified among 64 Group III *B. cereus s.l.* genomes which belonged to ST 26 (i.e., the  
365 “Original 2018/All NYS Outbreak” data set) using four different reference-based SNP calling  
366 pipelines, chosen for their ability to utilize assembled genomes or both assembled genomes and  
367 Illumina reads as input: (i) BactSNP version 1.1.0 (70), (ii) Lyve-SET version 1.1.4g (71), (iii)  
368 Parsnp version 1.2 (72), and (iv) Snippy version 4.3.6. For the BactSNP, Lyve-SET, and Snippy  
369 pipelines, which can utilize both Illumina reads and assembled genomes as input, Illumina reads  
370 were used for those isolates for which they were available ( $n = 32$ ; Trimmomatic and FastQC  
371 were used for preprocessing, as described in section “Construction of Group III *B. cereus s.l.* ST  
372 26 temporal phylogeny” above), and assembled genomes were used for the remaining isolates ( $n$   
373 = 32). For Parsnp, which relies on assembled genomes as input, all 64 ST 26 genome assemblies  
374 were used as input.

### **Cereulide synthetase acquisition and loss events within the evolutionary history of Group III *Bacillus cereus sensu lato* facilitate the transition between emetic and diarrheal foodborne pathogen**

375 For the BactSNP pipeline, all default steps were run as outlined in the manual. Gubbins  
376 was used to remove recombination events within the resulting pseudogenome alignment  
377 (`pseudo_genomes_wo_ref.fa`), and `snp-sites` was used to obtain an alignment of SNPs. For the  
378 Lyve-SET pipeline, all default steps were run as outlined in the manual. The resulting SNP  
379 alignment (`out.informative.fasta`) was queried using `snp-sites` to obtain an alignment of core  
380 SNPs. For the Snippy pipeline, steps were run as outlined above (see section “Group III *B.*  
381 *cereus s.l.* ST 26 temporal phylogeny construction”), with Gubbins and `snp-sites` used to create a  
382 core SNP alignment. For the Parsnp pipeline, core SNPs were identified using assembled  
383 genomes as input, and Parsnp’s implementation of PhiPack (73) was used to remove  
384 recombination events. For each SNP alignment identified with each pipeline, IQ-TREE was used  
385 to construct a ML phylogeny using the optimal ascertainment bias-aware nucleotide substitution  
386 model selected using ModelFinder and 1,000 replicates of the ultrafast bootstrap approximation.  
387 The `dist.gene` function in the `ape` package in R was used to calculate the number of pairwise SNP  
388 differences between each genome in each alignment.

389 Each of the four reference-based SNP calling pipelines described above was run six  
390 separate times, each time using one of the following Group III *B. cereus s.l.* genomes as a  
391 reference: (i) the complete, closed chromosome of emetic *B. cereus s.l.* ST 26 str. AH187  
392 (obtained from a human clinical isolate associated with a 1972 emetic outbreak in the United  
393 Kingdom, and previously shown to serve as an adequate reference genome for reference-based  
394 SNP calling among ST 26 genomes; NCBI RefSeq Accession NC\_011658.1) (9); (ii) the  
395 scaffolded draft genome of emetic *B. cereus s.l.* ST 26 str. IS195 (isolated from a pigmy shrew in  
396 Poland, and less closely related to other ST 26 isolates than *B. cereus s.l.* str. AH187; NCBI

### **Cereulide synthetase acquisition and loss events within the evolutionary history of Group III *Bacillus cereus sensu lato* facilitate the transition between emetic and diarrheal foodborne pathogen**

397 RefSeq Accession GCF\_000399225.1) (74-77); (iii) the contigs of emetic *B. cereus s.l.* ST 144  
398 str. MB.17 (isolated from food in Munich, Germany; NCBI RefSeq Accession  
399 GCF\_001566445.1) (78); (iv) the contigs of emetic *B. cereus s.l.* ST 2056 str. MB.18 (isolated  
400 from food in Munich, Germany; NCBI RefSeq Accession GCF\_001566385.1) (78); (v) the  
401 contigs of emetic *B. cereus s.l.* ST 869 str. MB.22 (isolated from food in Munich, Germany;  
402 NCBI RefSeq Accession GCF\_001566535.1) (78); (vi) the scaffolded draft genome of emetic *B.*  
403 *cereus s.l.* ST 164 str. AND1407 (isolated from black currants in Denmark; NCBI RefSeq  
404 Accession GCF\_000290995.1) (79, 80). This set of tested reference genomes represented all  
405 Group III STs in which cereulide synthetase-encoding genes were detected.

406         For each of the four SNP calling pipelines, the phylogeny constructed using SNPs  
407 identified with emetic *B. cereus s.l.* ST 26 str. AH187 as a reference genome was treated as a  
408 reference tree. The Kendall-Colijn (81, 82) test described by Katz et al. (71) was used to  
409 compare the topology of each tree constructed with SNPs identified using each of the remaining  
410 five reference genomes (emetic Group III *B. cereus s.l.* strains IS195, MB.17, MB.18, MB.22,  
411 and AND1407, representing STs 26, 144, 2056, 869, and 164, respectively) to the AH187  
412 reference phylogeny. For each query-reference tree combination, the Kendall-Colijn test was  
413 performed using midpoint-rooted trees, a lambda value of 0 (to give weight to tree topology,  
414 rather than branch lengths), a background distribution of 100,000 random trees (71), and the  
415 following R packages: treespace (83), phangorn, ggplot2 (84), stringr (85), docopt (86), ips (87).  
416 The Kendall-Colijn test procedure described above was then repeated for each pair of  
417 phylogenies, using the pipeline's respective AH187 phylogeny as the query phylogeny. Pairs of

## Cereulide synthetase acquisition and loss events within the evolutionary history of Group III *Bacillus cereus sensu lato* facilitate the transition between emetic and diarrheal foodborne pathogen

418 trees were considered to be more topologically similar than would be expected by chance (71) if  
419 a significant *P*-value resulted after a Bonferroni correction was applied ( $P < 0.05$ ).

420 **Data availability.** Supplemental Figures S1-S19 have been deposited in FigShare (DOI:  
421 <https://doi.org/10.6084/m9.figshare.c.5057276.v1>). Accession numbers for all isolates included  
422 in this study are available in Supplemental Table S1. BEAST 2 XML files, ancestral state  
423 reconstruction code, and phylogenies are available at:  
424 [https://github.com/lmc297/Group\\_III\\_bacillus\\_cereus](https://github.com/lmc297/Group_III_bacillus_cereus).

### 425 References

- 426 1. Pruitt KD, Tatusova T, Maglott DR. 2007. NCBI reference sequences (RefSeq): a curated  
427 non-redundant sequence database of genomes, transcripts and proteins. *Nucleic Acids*  
428 *Res* 35:D61-5.
- 429 2. Lechner S, Mayr R, Francis KP, Pruss BM, Kaplan T, Wiessner-Gunkel E, Stewart GS,  
430 Scherer S. 1998. *Bacillus weihenstephanensis* sp. nov. is a new psychrotolerant species of  
431 the *Bacillus cereus* group. *Int J Syst Bacteriol* 48 Pt 4:1373-82.
- 432 3. Guinebretiere MH, Auger S, Galleron N, Contzen M, De Sarrau B, De Buyser ML,  
433 Lamberet G, Fagerlund A, Granum PE, Lereclus D, De Vos P, Nguyen-The C, Sorokin  
434 A. 2013. *Bacillus cytotoxicus* sp. nov. is a novel thermotolerant species of the *Bacillus*  
435 *cereus* Group occasionally associated with food poisoning. *Int J Syst Evol Microbiol*  
436 63:31-40.
- 437 4. Jimenez G, Urdiain M, Cifuentes A, Lopez-Lopez A, Blanch AR, Tamames J, Kampfer  
438 P, Kolsto AB, Ramon D, Martinez JF, Codoner FM, Rossello-Mora R. 2013. Description  
439 of *Bacillus toyonensis* sp. nov., a novel species of the *Bacillus cereus* group, and pairwise  
440 genome comparisons of the species of the group by means of ANI calculations. *Syst Appl*  
441 *Microbiol* 36:383-91.
- 442 5. Miller RA, Beno SM, Kent DJ, Carroll LM, Martin NH, Boor KJ, Kovac J. 2016.  
443 *Bacillus wiedmannii* sp. nov., a psychrotolerant and cytotoxic *Bacillus cereus* group  
444 species isolated from dairy foods and dairy environments. *Int J Syst Evol Microbiol*  
445 66:4744-4753.
- 446 6. Liu Y, Du J, Lai Q, Zeng R, Ye D, Xu J, Shao Z. 2017. Proposal of nine novel species of  
447 the *Bacillus cereus* group. *Int J Syst Evol Microbiol* 67:2499-2508.
- 448 7. Carroll LM, Wiedmann M, Kovac J. 2020. Proposal of a Taxonomic Nomenclature for  
449 the *Bacillus cereus* Group Which Reconciles Genomic Definitions of Bacterial Species  
450 with Clinical and Industrial Phenotypes. *mBio* 11.
- 451 8. Carroll LM, Kovac J, Miller RA, Wiedmann M. 2017. Rapid, high-throughput  
452 identification of anthrax-causing and emetic *Bacillus cereus* group genome assemblies

### Cereulide synthetase acquisition and loss events within the evolutionary history of Group III *Bacillus cereus sensu lato* facilitate the transition between emetic and diarrheal foodborne pathogen

- 453 using BTyper, a computational tool for virulence-based classification of *Bacillus cereus*  
454 group isolates using nucleotide sequencing data. Appl Environ Microbiol  
455 doi:10.1128/AEM.01096-17.
- 456 9. Carroll LM, Wiedmann M, Mukherjee M, Nicholas DC, Mingle LA, Dumas NB, Cole  
457 JA, Kovac J. 2019. Characterization of Emetic and Diarrheal *Bacillus cereus* Strains  
458 From a 2016 Foodborne Outbreak Using Whole-Genome Sequencing: Addressing the  
459 Microbiological, Epidemiological, and Bioinformatic Challenges. Front Microbiol  
460 10:144.
- 461 10. Jain C, Rodriguez RL, Phillippy AM, Konstantinidis KT, Aluru S. 2018. High throughput  
462 ANI analysis of 90K prokaryotic genomes reveals clear species boundaries. Nat Commun  
463 9:5114.
- 464 11. Barrett T, Clark K, Gevorgyan R, Gorelenkov V, Gribov E, Karsch-Mizrachi I,  
465 Kimelman M, Pruitt KD, Resenchuk S, Tatusova T, Yaschenko E, Ostell J. 2012.  
466 BioProject and BioSample databases at NCBI: facilitating capture and organization of  
467 metadata. Nucleic Acids Res 40:D57-63.
- 468 12. Guinebretiere MH, Velge P, Couvert O, Carlin F, Debuyser ML, Nguyen-The C. 2010.  
469 Ability of *Bacillus cereus* group strains to cause food poisoning varies according to  
470 phylogenetic affiliation (groups I to VII) rather than species affiliation. J Clin Microbiol  
471 48:3388-91.
- 472 13. Jolley KA, Maiden MC. 2010. BIGSdb: Scalable analysis of bacterial genome variation  
473 at the population level. BMC Bioinformatics 11:595.
- 474 14. Vangay P, Fugett EB, Sun Q, Wiedmann M. 2013. Food microbe tracker: a web-based  
475 tool for storage and comparison of food-associated microbes. J Food Prot 76:283-94.
- 476 15. Gardner SN, Hall BG. 2013. When whole-genome alignments just won't work: kSNP v2  
477 software for alignment-free SNP discovery and phylogenetics of hundreds of microbial  
478 genomes. PLoS One 8:e81760.
- 479 16. Gardner SN, Slezak T, Hall BG. 2015. kSNP3.0: SNP detection and phylogenetic  
480 analysis of genomes without genome alignment or reference genome. Bioinformatics  
481 31:2877-8.
- 482 17. Nguyen LT, Schmidt HA, von Haeseler A, Minh BQ. 2015. IQ-TREE: a fast and  
483 effective stochastic algorithm for estimating maximum-likelihood phylogenies. Mol Biol  
484 Evol 32:268-74.
- 485 18. Lewis PO. 2001. A likelihood approach to estimating phylogeny from discrete  
486 morphological character data. Syst Biol 50:913-25.
- 487 19. Kalyaanamoorthy S, Minh BQ, Wong TKF, von Haeseler A, Jermin LS. 2017.  
488 ModelFinder: fast model selection for accurate phylogenetic estimates. Nat Methods  
489 14:587-589.
- 490 20. Minh BQ, Nguyen MA, von Haeseler A. 2013. Ultrafast approximation for phylogenetic  
491 bootstrap. Mol Biol Evol 30:1188-95.
- 492 21. Hoang DT, Chernomor O, von Haeseler A, Minh BQ, Vinh LS. 2018. UFBoot2:  
493 Improving the Ultrafast Bootstrap Approximation. Mol Biol Evol 35:518-522.
- 494 22. Paradis E, Claude J, Strimmer K. 2004. APE: Analyses of Phylogenetics and Evolution in  
495 R language. Bioinformatics 20:289-90.
- 496 23. Paradis E, Schliep K. 2019. ape 5.0: an environment for modern phylogenetics and  
497 evolutionary analyses in R. Bioinformatics 35:526-528.

**Cereulide synthetase acquisition and loss events within the evolutionary history of Group III *Bacillus cereus sensu lato* facilitate the transition between emetic and diarrheal foodborne pathogen**

- 498 24. R Core Team. 2019. R: A Language and Environment for Statistical Computing, v3.6.1.  
499 R Foundation for Statistical Computing, Vienna, Austria. <https://www.R-project.org/>.
- 500 25. Revell LJ. 2012. phytools: an R package for phylogenetic comparative biology (and other  
501 things). *Methods in Ecology and Evolution* 3:217-223.
- 502 26. Tonkin-Hill G, Lees JA, Bentley SD, Frost SDW, Corander J. 2018. RhierBAPS: An R  
503 implementation of the population clustering algorithm hierBAPS. *Wellcome Open Res*  
504 3:93.
- 505 27. Arevalo P, VanInsberghe D, Elsherbini J, Gore J, Polz MF. 2019. A Reverse Ecology  
506 Approach Based on a Biological Definition of Microbial Populations. *Cell* 178:820-834  
507 e14.
- 508 28. Angiuoli SV, Salzberg SL. 2011. Mugsy: fast multiple alignment of closely related whole  
509 genomes. *Bioinformatics* 27:334-42.
- 510 29. Guindon S, Dufayard JF, Lefort V, Anisimova M, Hordijk W, Gascuel O. 2010. New  
511 algorithms and methods to estimate maximum-likelihood phylogenies: assessing the  
512 performance of PhyML 3.0. *Syst Biol* 59:307-21.
- 513 30. Steinegger M, Soding J. 2017. MMseqs2 enables sensitive protein sequence searching for  
514 the analysis of massive data sets. *Nat Biotechnol* 35:1026-1028.
- 515 31. Edgar RC. 2004. MUSCLE: multiple sequence alignment with high accuracy and high  
516 throughput. *Nucleic Acids Res* 32:1792-7.
- 517 32. Boskova V, Stadler T. 2020. PIQMEE: Bayesian phylodynamic method for analysis of  
518 large datasets with duplicate sequences. *Molecular Biology and Evolution*  
519 doi:10.1093/molbev/msaa136.
- 520 33. Lapierre M, Blin C, Lambert A, Achaz G, Rocha EP. 2016. The Impact of Selection,  
521 Gene Conversion, and Biased Sampling on the Assessment of Microbial Demography.  
522 *Mol Biol Evol* 33:1711-25.
- 523 34. Seemann T. 2019. Snippy: Rapid haploid variant calling and core genome alignment,  
524 v4.3.6. <https://github.com/tseemann/snippy>.
- 525 35. Li H, Durbin R. 2009. Fast and accurate short read alignment with Burrows-Wheeler  
526 transform. *Bioinformatics* 25:1754-60.
- 527 36. Li H. 2013. Aligning sequence reads, clone sequences and assembly contigs with BWA-  
528 MEM. arXiv:1303.3997.
- 529 37. Li H. 2018. Minimap2: pairwise alignment for nucleotide sequences. *Bioinformatics*  
530 34:3094-3100.
- 531 38. Li H, Handsaker B, Wysoker A, Fennell T, Ruan J, Homer N, Marth G, Abecasis G,  
532 Durbin R, Genome Project Data Processing S. 2009. The Sequence Alignment/Map  
533 format and SAMtools. *Bioinformatics* 25:2078-9.
- 534 39. Quinlan AR. 2014. BEDTools: The Swiss-Army Tool for Genome Feature Analysis. *Curr*  
535 *Protoc Bioinformatics* 47:11 12 1-34.
- 536 40. Quinlan AR, Hall IM. 2010. BEDTools: a flexible suite of utilities for comparing  
537 genomic features. *Bioinformatics* 26:841-2.
- 538 41. Li H. 2011. A statistical framework for SNP calling, mutation discovery, association  
539 mapping and population genetical parameter estimation from sequencing data.  
540 *Bioinformatics* 27:2987-93.
- 541 42. Garrison E, Marth G. 2012. Haplotype-based variant detection from short-read  
542 sequencing. arXiv:1207.3907.

### Cereulide synthetase acquisition and loss events within the evolutionary history of Group III *Bacillus cereus sensu lato* facilitate the transition between emetic and diarrheal foodborne pathogen

- 543 43. Cleary JG, Braithwaite R, Gaastra K, Hilbush BS, Inglis S, Irvine SA, Jackson A, Littin  
544 R, Rathod M, Ware D, Zook JM, Trigg L, De La Vega FM. 2015. Comparing Variant  
545 Call Files for Performance Benchmarking of Next-Generation Sequencing Variant  
546 Calling Pipelines. bioRxiv doi:10.1101/023754:023754.
- 547 44. Tan A, Abecasis GR, Kang HM. 2015. Unified representation of genetic variants.  
548 *Bioinformatics* 31:2202-4.
- 549 45. Cingolani P, Platts A, Wang le L, Coon M, Nguyen T, Wang L, Land SJ, Lu X, Ruden  
550 DM. 2012. A program for annotating and predicting the effects of single nucleotide  
551 polymorphisms, SnpEff: SNPs in the genome of *Drosophila melanogaster* strain w1118;  
552 iso-2; iso-3. *Fly (Austin)* 6:80-92.
- 553 46. Seemann T. 2019. samclip: Filter SAM file for soft and hard clipped alignments, v0.2.  
554 <https://github.com/tseemann/samclip>.
- 555 47. Li H. 2019. Seqtk: a fast and lightweight tool for processing sequences in the FASTA or  
556 FASTQ format, v1.2-r102-dirty <https://github.com/lh3/seqtk>.
- 557 48. Page AJ, Taylor B, Delaney AJ, Soares J, Seemann T, Keane JA, Harris SR. 2016. SNP-  
558 sites: rapid efficient extraction of SNPs from multi-FASTA alignments. *Microb Genom*  
559 2:e000056.
- 560 49. Bolger AM, Lohse M, Usadel B. 2014. Trimmomatic: a flexible trimmer for Illumina  
561 sequence data. *Bioinformatics* 30:2114-20.
- 562 50. Andrews S. 2019. FastQC: a quality control tool for high throughput sequence data,  
563 v0.11.8. <https://www.bioinformatics.babraham.ac.uk/projects/fastqc/>.
- 564 51. Croucher NJ, Page AJ, Connor TR, Delaney AJ, Keane JA, Bentley SD, Parkhill J, Harris  
565 SR. 2015. Rapid phylogenetic analysis of large samples of recombinant bacterial whole  
566 genome sequences using Gubbins. *Nucleic Acids Res* 43:e15.
- 567 52. Rambaut A, Lam TT, Max Carvalho L, Pybus OG. 2016. Exploring the temporal  
568 structure of heterochronous sequences using TempEst (formerly Path-O-Gen). *Virus Evol*  
569 2:vew007.
- 570 53. To T-H, Jung M, Lycett S, Gascuel O. 2015. Fast Dating Using Least-Squares Criteria  
571 and Algorithms. *Systematic Biology* 65:82-97.
- 572 54. Tewari A, Abdullah S. 2015. *Bacillus cereus* food poisoning: international and Indian  
573 perspective. *J Food Sci Technol* 52:2500-11.
- 574 55. Xie W, Lewis PO, Fan Y, Kuo L, Chen MH. 2011. Improving marginal likelihood  
575 estimation for Bayesian phylogenetic model selection. *Syst Biol* 60:150-60.
- 576 56. Bouckaert R, Vaughan TG, Barido-Sottani J, Duchene S, Fourment M, Gavryushkina A,  
577 Heled J, Jones G, Kuhnert D, De Maio N, Matschiner M, Mendes FK, Muller NF,  
578 Ogilvie HA, du Plessis L, Poppinga A, Rambaut A, Rasmussen D, Siveroni I, Suchard  
579 MA, Wu CH, Xie D, Zhang C, Stadler T, Drummond AJ. 2019. BEAST 2.5: An  
580 advanced software platform for Bayesian evolutionary analysis. *PLoS Comput Biol*  
581 15:e1006650.
- 582 57. Bouckaert R, Heled J, Kuhnert D, Vaughan T, Wu CH, Xie D, Suchard MA, Rambaut A,  
583 Drummond AJ. 2014. BEAST 2: a software platform for Bayesian evolutionary analysis.  
584 *PLoS Comput Biol* 10:e1003537.
- 585 58. Bouckaert R. 2014. Correcting for constant sites in BEAST2.  
586 <https://groups.google.com/forum/#!topic/beast-users/QfBHMOqImFE>. Accessed July 11,  
587 2020.



### Cereulide synthetase acquisition and loss events within the evolutionary history of Group III *Bacillus cereus sensu lato* facilitate the transition between emetic and diarrheal foodborne pathogen

- 588 59. Drummond AJ, Ho SY, Phillips MJ, Rambaut A. 2006. Relaxed phylogenetics and dating  
589 with confidence. PLoS Biol 4:e88.
- 590 60. Drummond AJ, Rambaut A, Shapiro B, Pybus OG. 2005. Bayesian coalescent inference  
591 of past population dynamics from molecular sequences. Mol Biol Evol 22:1185-92.
- 592 61. Stadler T, Kuhnert D, Bonhoeffer S, Drummond AJ. 2013. Birth-death skyline plot  
593 reveals temporal changes of epidemic spread in HIV and hepatitis C virus (HCV). Proc  
594 Natl Acad Sci U S A 110:228-33.
- 595 62. Bouckaert R, Xie D. 2017. SSN: Standard Nucleotide Substitution Models,  
596 <http://doi.org/10.5281/zenodo.995740>.
- 597 63. Schliep KP. 2011. phangorn: phylogenetic analysis in R. Bioinformatics 27:592-3.
- 598 64. Zimmermann F. 2019. Epidemiology and Ecology of *Bacillus cereus* biovar *anthracis* in  
599 Taï National Park, Côte d'Ivoire doi:<http://dx.doi.org/10.17169/refubium-1460>.
- 600 65. Rambaut A, Drummond AJ, Xie D, Baele G, Suchard MA. 2018. Posterior  
601 Summarization in Bayesian Phylogenetics Using Tracer 1.7. Syst Biol 67:901-904.
- 602 66. Heled J, Bouckaert RR. 2013. Looking for trees in the forest: summary tree from  
603 posterior samples. BMC Evol Biol 13:221.
- 604 67. Rambaut A. 2016. FigTree: a graphical viewer of phylogenetic trees, v1.4.3.  
605 <http://tree.bio.ed.ac.uk/software/figtree/>.
- 606 68. Yu G, Smith DK, Zhu H, Guan Y, Lam TT-Y. 2017. ggtree: an r package for  
607 visualization and annotation of phylogenetic trees with their covariates and other  
608 associated data. Methods in Ecology and Evolution 8:28-36.
- 609 69. Yu G, Lam TT, Zhu H, Guan Y. 2018. Two Methods for Mapping and Visualizing  
610 Associated Data on Phylogeny Using Ggtree. Mol Biol Evol 35:3041-3043.
- 611 70. Yoshimura D, Kajitani R, Gotoh Y, Katahira K, Okuno M, Ogura Y, Hayashi T, Itoh T.  
612 2019. Evaluation of SNP calling methods for closely related bacterial isolates and a novel  
613 high-accuracy pipeline: BactSNP. Microb Genom 5.
- 614 71. Katz LS, Griswold T, Williams-Newkirk AJ, Wagner D, Petkau A, Sieffert C, Van  
615 Domselaar G, Deng X, Carleton HA. 2017. A Comparative Analysis of the Lyve-SET  
616 Phylogenomics Pipeline for Genomic Epidemiology of Foodborne Pathogens. Front  
617 Microbiol 8:375.
- 618 72. Treangen TJ, Ondov BD, Koren S, Phillippy AM. 2014. The Harvest suite for rapid core-  
619 genome alignment and visualization of thousands of intraspecific microbial genomes.  
620 Genome Biol 15:524.
- 621 73. Bruen TC, Philippe H, Bryant D. 2006. A simple and robust statistical test for detecting  
622 the presence of recombination. Genetics 172:2665-81.
- 623 74. Castiaux V, N'Guessan E, Swiecicka I, Delbrassinne L, Dierick K, Mahillon J. 2014.  
624 Diversity of pulsed-field gel electrophoresis patterns of cereulide-producing isolates of  
625 *Bacillus cereus* and *Bacillus weihenstephanensis*. FEMS Microbiol Lett 353:124-31.
- 626 75. Van der Auwera GA, Feldgarden M, Kolter R, Mahillon J. 2013. Whole-Genome  
627 Sequences of 94 Environmental Isolates of *Bacillus cereus Sensu Lato*. Genome Announc  
628 1.
- 629 76. Swiecicka I, Fiedoruk K, Bednarz G. 2002. The occurrence and properties of *Bacillus*  
630 *thuringiensis* isolated from free-living animals. Lett Appl Microbiol 34:194-8.
- 631 77. Swiecicka I, De Vos P. 2003. Properties of *Bacillus thuringiensis* isolated from bank  
632 voles. J Appl Microbiol 94:60-4.



### Cereulide synthetase acquisition and loss events within the evolutionary history of Group III *Bacillus cereus sensu lato* facilitate the transition between emetic and diarrheal foodborne pathogen

- 633 78. Crovadore J, Calmin G, Tonacini J, Chablais R, Schnyder B, Messelhauser U, Lefort F.  
634 2016. Whole-Genome Sequences of Seven Strains of *Bacillus cereus* Isolated from  
635 Foodstuff or Poisoning Incidents. *Genome Announc* 4.
- 636 79. Hoton FM, Fornelos N, N'Guessan E, Hu X, Swiecicka I, Dierick K, Jaaskelainen E,  
637 Salkinoja-Salonen M, Mahillon J. 2009. Family portrait of *Bacillus cereus* and *Bacillus*  
638 *weihenstephanensis* cereulide-producing strains. *Environ Microbiol Rep* 1:177-83.
- 639 80. Biodefense and Emerging Infections (BEI) Research Resources Repository. 2019.  
640 *Bacillus cereus* Strain AND1407, NR-22159.  
641 <https://www.beiresources.org/Catalog/Bacteria/NR-22159.aspx>. Accessed December 24,  
642 2019.
- 643 81. Kendall M, Colijn C. 2016. Mapping Phylogenetic Trees to Reveal Distinct Patterns of  
644 Evolution. *Molecular Biology and Evolution* 33:2735-2743.
- 645 82. Kendall M, Colijn C. 2015. A tree metric using structure and length to capture distinct  
646 phylogenetic signals. arXiv:1507.05211.
- 647 83. Jombart T, Kendall M, Almagro-Garcia J, Colijn C. 2017. treespace: Statistical  
648 exploration of landscapes of phylogenetic trees. *Mol Ecol Resour* 17:1385-1392.
- 649 84. Wickham H. 2016. ggplot2: Elegant Graphics for Data Analysis. Springer-Verlag New  
650 York.
- 651 85. Wickham H. 2019. stringr: Simple, Consistent Wrappers for Common String Operations,  
652 <https://CRAN.R-project.org/package=stringr>.
- 653 86. de Jonge E. 2018. docopt: Command-Line Interface Specification Language,  
654 <https://CRAN.R-project.org/package=docopt>.
- 655 87. Heibl C. 2008. PHYLOCH: R language tree plotting tools and interfaces to diverse  
656 phylogenetic software packages, <http://www.christophheibl.de/Rpackages.html>.

657
